# Supplementary material
Source: publisher figshare collection journal article supplement (https://gsapubs.figshare.com/ndownloader/files/22742405)
Supplement: Supplementary file 1 [file 22742405]

TABLE 1

| Region        | Uplift rate ( $V_z$ ) | Thermal gradients | Topographic gradients                                                                                            | Structure           |               |                                                                                 | Fluid chemistry             |                                              |                                                                           | Dominant driving force for fluid flow |                                    |                                                                  |
|---------------|-----------------------|-------------------|------------------------------------------------------------------------------------------------------------------|---------------------|---------------|---------------------------------------------------------------------------------|-----------------------------|----------------------------------------------|---------------------------------------------------------------------------|---------------------------------------|------------------------------------|------------------------------------------------------------------|
|               |                       |                   |                                                                                                                  | Dip of shear planes | Volume change | Permeability                                                                    | Depth*                      | Temperature estimates ( $^{\circ}\text{C}$ ) | Comp                                                                      |                                       | Isotopes                           | C                                                                |
| Inboard       | $>5$ mm/y             | High              | <i>Long wavelength:</i><br>steep $\approx 11^{\circ}$<br><i>Short wavelength:</i><br>steep $\approx 4.5^{\circ}$ | Steep               | Minor         | $<5$ km; $>10^{14}\text{m}^2$ near-surface<br>$>5\text{km}$ ; dynamic only A, B | $\leq 3$ km C               | 250 - 350                                    | $\text{H}_2\text{O}$ , variable $\text{CO}_2$ , NaCl $\text{H}_2\text{O}$ | Partially exchanged meteoric rock     | Partially exchanged meteoric rock  | Topographic gradients<br>Thermal gradients<br>Dilatancy kneading |
|               |                       |                   |                                                                                                                  |                     |               |                                                                                 |                             |                                              |                                                                           |                                       |                                    |                                                                  |
|               |                       |                   |                                                                                                                  |                     |               |                                                                                 |                             |                                              |                                                                           |                                       |                                    |                                                                  |
| Main Divide + | 1-2 mm/y              | Moderate          | <i>Long and short wavelength:</i><br>steep $\approx 3.5^{\circ}$                                                 | Steep and mixed     | (+)           | Static; moderate to high at shallow levels                                      | Near-surface $\text{F}_1$ F | Variable, 50 - 250                           | $\text{H}_2\text{O}$ minor $\text{CO}_2$ $\text{H}_2\text{O}$             | Meteoric, rock-exchanged Meteoric     | ? Rock-exchanged Organic-exchanged | Net volume increase                                              |
|               |                       |                   |                                                                                                                  |                     |               |                                                                                 |                             |                                              |                                                                           |                                       |                                    |                                                                  |
|               |                       |                   |                                                                                                                  |                     |               |                                                                                 |                             |                                              |                                                                           |                                       |                                    |                                                                  |
| Outboard      | 0.5-1.0 mm/y          | Low               | <i>Long wavelength:</i><br>moderate $\approx 5^{\circ}$                                                          | Moderate            | (-)           | $>10^{15}\text{m}^2$                                                            | Near-surface in basement    | $<100$                                       | $\text{H}_2\text{O}$                                                      | Meteoric                              | Organic-exchanged                  | Topographic gradients<br>sediment compaction                     |
|               |                       |                   |                                                                                                                  |                     |               |                                                                                 |                             |                                              |                                                                           |                                       |                                    |                                                                  |
|               |                       |                   |                                                                                                                  |                     |               |                                                                                 |                             |                                              |                                                                           |                                       |                                    |                                                                  |

\* Letters refer to sample locations in Figure 2 and text  
+ Mixer is beneath 15km, not sampled, and not included in this table
